# Supplementary material
Source: MDPI journal article supplement (https://www.mdpi.com/2313-0105/9/7/366)

# **Photothermal conversion enhanced LiMn<sub>2</sub>O<sub>4</sub> Pouch Cell performance for low-temperature resistance: a theoretical study**

**Shuo Tian <sup>1</sup>, Zhifeng Liu <sup>1</sup>, Yang Qiang <sup>1</sup>, Na Xu <sup>1</sup>, Xiang Li <sup>1</sup>, Dejun Wang <sup>1</sup>, Runru Liu <sup>1,\*</sup> and Wei Lü <sup>2,3,\*</sup>**

<sup>1</sup> Key Laboratory of Materials Design and Quantum Simulation, College of Science, Changchun University, Changchun 130022, China; tiandoc2021@163.com (S.T.); m18338910912@163.com (Z.L.); yangq@ccu.edu.cn (Q.Y.); m18332763806@163.com (N.X.); 17719529449@163.com (X.L.); wangdj@ccu.edu.cn (D.W.)

<sup>2</sup> Key Laboratory of Advanced Structural Materials, Ministry of Education & Advanced Institute of Materials Science, Changchun University of Technology, Changchun 130012, China

<sup>3</sup> State Key Laboratory of Luminescence and Applications, Changchun Institute of Optics, Fine Mechanics and Physics, Chinese Academy of Sciences, Changchun 130033, China

\* Correspondence: liurr@ccu.edu.cn (R.L.); lvwei@ccut.edu.cn (W.L.)

**Table S1: Comprehensive parameter of LIB**

| Parameter                  | Al Collector | Cathode               | Separator | Anode                 | Cu Collector | Description                  |
|----------------------------|--------------|-----------------------|-----------|-----------------------|--------------|------------------------------|
| L (mm)                     | 0.1          | 0.3                   | 0.07      | 0.3                   | 0.1          | Electrode thickness          |
| r(m)                       |              | $2 \times 10^{-6}$    |           | $5 \times 10^{-6}$    |              | Particle size                |
| $i_{0ref}(A/m^2)$          |              | 0.70                  |           | 0.96                  |              | Reference current density    |
| epss                       |              | 0.5                   |           | 0.45                  |              | Solid volume fraction        |
| cs <sub>0</sub>            |              | 21735                 |           | 1200                  |              | Initial substance solubility |
| csmax(mol/m <sup>3</sup> ) |              | 22860                 |           | 31507                 |              | Max substance concentration  |
| $\alpha$                   |              | 0.5                   |           | 0.5                   |              | Transfer coefficient         |
| eps <sub>l</sub>           |              | 0.4                   |           | 0.4                   |              | liquid volume fraction       |
| k(m/s)                     |              | $4.8 \times 10^{-10}$ |           | $4.4 \times 10^{-10}$ |              | rate constant                |

**Table S2: Subscripts**

|     |                 |                |                   |
|-----|-----------------|----------------|-------------------|
| p   | Positive        | l              | liquid phase      |
| n   | Negative        | re             | reversible        |
| sep | Separator       | eq             | Equilibrium       |
| a   | Anode           | cell           | Battery           |
| c   | Cathode         | irre           | Irreversible      |
| ref | Reference       | amb            | Ambient           |
| eff | Effective value | e              | Electrolyte phase |
| ext | external        | J <sub>h</sub> | Joule heat        |
| s   | solid phase     | rad            | radiant           |

**Figure S1: Panasonic UF653445ST commercial battery curves**

### Charge Characteristics

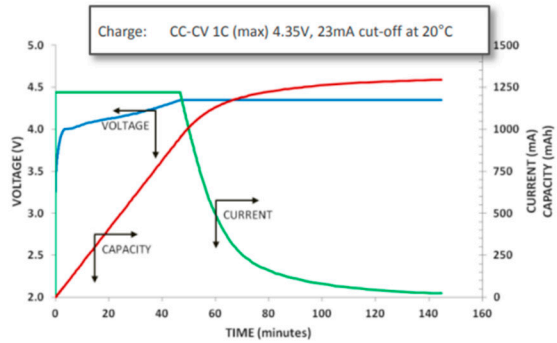

### Discharge Characteristics (by temperature)

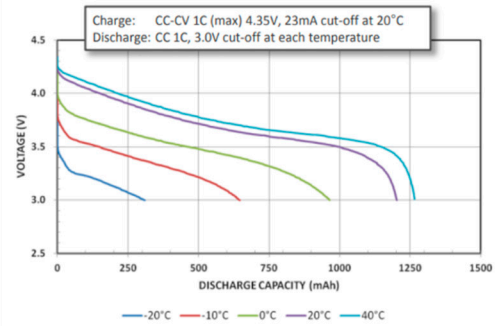

Supplement: s1 [file s1]
